# 1 **Extraction of ultrashort DNA molecules from herbarium**

## 2 **specimens**

3 Rafal M. Gutaker<sup>1</sup>, Ella Reiter<sup>2</sup>, Anja Furtwängler<sup>2</sup>, Verena J. Schuenemann<sup>2,3</sup>, Hernán

4 A. Burbano<sup>1,\*</sup>

5 <sup>1</sup>Research Group for Ancient Genomics and Evolution, Department of Molecular Biology, Max Planck

6 Institute for Developmental Biology, Tuebingen 72076, Germany

7 <sup>2</sup>Institute of Archaeological Sciences, University of Tuebingen, Tuebingen 72076, Germany

8 <sup>3</sup>Senckenberg Center for Human Evolution and Paleoenvironment, University of Tübingen, Tübingen

9 72076, Germany.

10 \*Address correspondence to Hernán A. Burbano, Research Group for Ancient Genomics and

11 Evolution, Department of Molecular Biology, Max Planck Institute for Developmental Biology. E-

12 mail: [hernan.burbano@tuebingen.mpg.de](mailto:hernan.burbano@tuebingen.mpg.de)

13 Keywords: ancient DNA; herbarium; DNA extraction; paleogenomics; next-

14 generation sequencing

15

16 **Abstract**

17 DNA extracted from herbarium specimens is highly fragmented and decays at a faster  
18 rate than DNA from ancient bones. Therefore, it is crucial to utilize extraction  
19 protocols that retrieve short DNA molecules. Improvements in extraction and library  
20 preparation protocols for animal remains have allowed efficient retrieval of molecules  
21 shorter than 50 bp. We adapted those improvements to extraction protocols for  
22 herbarium specimens and evaluated their performance by shotgun sequencing, which  
23 allows an accurate estimation of the distribution of fragment lengths. Extraction with  
24 PTB buffer decreased median fragment length by 35% when compared to CTAB.  
25 Modifying the binding conditions of DNA to silica allowed for an additional decrease  
26 of 10%. We did not observe a further decrease in length when we used single-  
27 stranded instead of double-stranded library preparation methods. Our protocol enables  
28 the retrieval of ultrashort molecules from herbarium specimens and will help to  
29 unlock the genetic information stored in herbaria.

30 **Method summary**

31 We optimized the extraction procedure for isolating ultrashort DNA fragments from  
32 herbarium specimens through combination of PTB lysis buffer and modifications  
33 previously used for ancient bones. We show the advantage of this protocol over others  
34 by estimating the DNA fragment length through shotgun sequencing.

35

36 Since ancient DNA (aDNA) is highly fragmented, it is particularly important to  
37 employ extraction protocols that retrieve ultrashort molecules (< 50 bp). It has been  
38 shown that a recently developed extraction protocol for animal remains efficiently

39 recovers those molecules (1), which has allowed sequencing highly fragmented  
40 hominin (2) and cave bear remains (1) that are hundreds of thousands of years old.  
41 DNA retrieved from herbarium specimens is also highly fragmented because it decays  
42 six times faster than in bones (3). Consequently, DNA from century-old herbarium  
43 specimens is as short as that of thousands of years old animal remains. To take full  
44 advantage of the genetic information stored in those samples it is important to  
45 optimize the extraction of ultrashort molecules from desiccated plant tissue.

46 We assessed the impact of extraction and library preparation methods on the  
47 distribution of DNA fragment lengths in 20 *Arabidopsis thaliana* herbarium  
48 specimens, which were collected between 1839 and 1898 (Table S1). We used a  
49 hierarchical experimental design that includes three different phases due to limited  
50 availability of tissue per sample (Figure 1). In phase one and two we used 10 *A.*  
51 *thaliana* samples (~20 mg of leaf tissue each), which were subjected to two different  
52 extraction protocols (~10 mg of tissue per treatment), followed by double-stranded  
53 library preparation. To compare the performance of double- and single-stranded  
54 library preparation methods, in phase three we applied single-stranded library  
55 preparation method to DNA extracts produced by the most efficient DNA extraction  
56 protocol in phase two. In each phase we evaluated the performance of the methods by  
57 sequencing the genomic libraries with the Illumina MiSeq platform (Table S2).

58 Extraction buffers used for ancient bones and teeth are commonly composed  
59 predominantly or exclusively of EDTA and proteinase K (4), reagents that are not  
60 optimal for DNA extraction from plant tissue. Hence, in the first phase we tested two  
61 commonly used DNA extraction buffers for historical plant specimens, which contain  
62 either cetyl-trimethyl ammonium bromide (CTAB), or a mixture of N-  
63 phenacylthiazolium bromide (PTB) and dithiothreitol (DTT) (5) (Figure 1). CTAB is

64 a strong detergent that under high salt concentrations binds to polysaccharides and  
65 aids their removal from the solution (6). Although CTAB is highly used in DNA  
66 extractions from modern plants, it has been shown that it does not have a detectable  
67 effect when applied to non-carbonized archaeobotanical remains (7). PTB is a  
68 substance that cleaves glucose-derived protein cross-links (8) and can help to release  
69 DNA trapped within sugar-derived condensation products (9); it has been effectively  
70 used to retrieve DNA from archaeobotanical remains (10). DTT digests disulfide  
71 bonds releasing thiolated DNA from cross-link complexes (11). In order to allow  
72 better comparison of the CTAB and PTB protocols, we replaced the ethanol  
73 precipitation step of the CTAB method with silica column binding (12) provided with  
74 the DNeasy® Plant Mini Kit. Subsequently, libraries were prepared using a double  
75 stranded DNA library protocol (13).

76         Based on qPCR measurements on unamplified libraries, the PTB protocol  
77 recover a higher number of unique library molecules than CTAB protocol (paired t-  
78 test  $p = 0.007$ ) (Figure 2F and Table S3). We found that PTB decreases the median  
79 fragment length by 35% (from 88 to 57 bp) (paired t-test  $p = 2.8e-06$ ) when compared  
80 to CTAB (Figure 2A and 2B). This decrease in length was also manifested as a higher  
81 proportion of damaged sites ( $\lambda$ ) (paired t-test  $p = 1.3e-06$ ) (Figure 2C), which  
82 represents the fraction of bonds broken in the DNA backbone (14, 15). In addition,  
83 DNA molecules extracted with PTB buffer showed more cytosine (C) to thymine (T)  
84 substitutions at the 5' end (paired t-test  $p = 1.2e-06$ ; Figure 2G). C-to-T substitutions  
85 are typical damage patterns of aDNA and result from spontaneous deamination of C  
86 to uracil (U), which is read as T by the polymerase (16, 17). It is possible that shorter  
87 and more damaged fragments of DNA were released after cross-links were resolved  
88 by PTB and DTT, since there is a strong negative correlation between median

89 fragment length and C-to-T substitutions at first base ( $R^2 = 0.44$ ;  $p = 1.5e-07$ ;  $N = 50$ )  
90 (Figure S4). Alternatively, the observed variation in fragment length distribution  
91 could be explained by unknown chemical incompatibilities of lysis and binding  
92 buffer, i.e. certain reagents could in principle reduce DNA-binding properties of the  
93 buffer. Finally, in the CTAB protocol we apply a chloroform-isoamyl alcohol wash,  
94 which could also reduce recovery of short molecules.

95         In the second phase, to further increase the recovery of short fragments, we  
96 used PTB/DTT, which was the most successful extraction buffer in phase 1, and  
97 evaluated two systems for binding DNA to silica. We tested DNeasy® mini spin  
98 columns (Qiagen) in combination with the binding buffer used in the Plant Mini kit  
99 and MinElute® silica spin columns in conjunction with a binding buffer optimized for  
100 the recovery of short molecules from animal remains (1) (Figure 1). We found that the  
101 latter method decreased the median fragment length by 10% (from 60 to 54 bp)  
102 (paired t-test  $p = 1.9e-04$ ), which shows that it is suitable to recover very short  
103 sequences also from herbarium specimens (Figure 2A and B). The frequency of C-to-  
104 T substitutions at the first base differed significantly between the two DNA binding  
105 methods (paired t-test  $p = 3.3e-03$ ) (Figure 2G), with a decrease in median fragment  
106 length again being accompanied by an increase in C-to-T substitutions.

107         To investigate whether library preparation has an effect on fragment length  
108 distribution, in the third phase we produced single-stranded DNA (ssDNA) libraries  
109 using the extracts from the modified PTB/DTT extraction (18,19) and compared them  
110 to the dsDNA libraries constructed from the modified PTB extraction material of  
111 phase 2 (Figure 1). We did not observe a significant decrease of the median of the  
112 fragment length distribution in ssDNA libraries (paired t-test  $p = 0.44$ ) (Figure 2A and  
113 B). Instead, the shape of the distribution changed towards larger numbers of longer

114 and shorter molecules at the cost of intermediate-size molecules, which is reflected in  
115 decreased lambda (Figure 2C) and congruent with previous findings (19). Similarly to  
116 Gansauge and Meyer (2013), we also detected a reduction of GC content in ssDNA  
117 libraries when compared to dsDNA (Figure 2D). This phenomenon can be attributed  
118 to a known bias in dsDNA libraries towards molecules with higher GC content  
119 (20,21). We detected uniform GC content across the distribution of fragment lengths,  
120 which suggests that the ssDNA library preparation protocol excels in reducing those  
121 biases (Figure S8). In contrast to previous reports (19), the ssDNA library method did  
122 not produce an increase in the proportion of endogenous DNA (Figure 2E, Figure S1,  
123 S6). However, it has been suggested that increase in the proportion of endogenous  
124 DNA occurs only when the initial content of endogenous DNA is lower than 10% (22,  
125 23). Our *A. thaliana* samples have endogenous DNA between 16% and 94%, which  
126 could explain why we did not detect a gain in endogenous DNA.

127 In summary, we demonstrate that the choice of extraction buffer has a great impact on  
128 the length distribution of molecules recovered from herbarium specimens. Ultrashort  
129 molecules are most efficiently retrieved using a combination of PTB/DTT mixture for  
130 DNA extraction and the buffers and conditions suggested by Dabney *et al.* (2013) for  
131 DNA binding. The two library preparation methods tested here appear to be equally  
132 efficient in retaining short DNA fragments, however, while single stranded method  
133 reduces GC bias in library it also decreases the fraction of endogenous DNA. We  
134 present the DNA extraction protocol that increases the recovery of short fragments  
135 and thus the accessibility of precious herbarium specimens for genetic analyses.

136

137

138 **Author contributions**

139 R.M.G, V.J.S, and H.A.B designed the experiments. R.M.G., E.R. and A.F.  
140 performed the experiments. R.M.G analyzed the data. R.M.G and H.A.B wrote the  
141 manuscript with contributions from all authors.

142 **Acknowledgements**

143 We thank curators from the Missouri Botanical Garden, University of Illinois,  
144 National Museum of Natural History, West Virginia University, Harvard University  
145 and New York Botanical Gardens for kindly providing samples for this study; Marco  
146 Thines, Charles B. Fenster and Matthew T. Rutter for sampling the herbarium  
147 specimens; Daniel Koenig for advice in the experimental design; Patricia Lang,  
148 members of the Research Group for Ancient Genomics and Evolutions, and especially  
149 Matthias Meyer for comments on the manuscript. This work was funded by the  
150 Presidential Innovation Fund of the Max Planck Society.

151 **Competing interests**

152 The authors declare no competing interests

153

154 **References**

- 155 **1.Dabney, J., M. Knapp, I. Glocke, M.T. Gansauge, A. Weihmann, B. Nickel, C.**  
156 **Valdiosera, N. Garcia, et al.** 2013. Complete mitochondrial genome  
157 sequence of a Middle Pleistocene cave bear reconstructed from ultrashort  
158 DNA fragments. Proceedings of the National Academy of Sciences of the  
159 United States of America *110*:15758-15763.
- 160 **2.Meyer, M., J.L. Arsuaga, C. de Filippo, S. Nagel, A. Aximu-Petri, B. Nickel, I.**  
161 **Martinez, A. Gracia, et al.** 2016. Nuclear DNA sequences from the Middle  
162 Pleistocene Sima de los Huesos hominins. Nature *531*:504-507.
- 163 **3.Weiss, C.L., V.J. Schuenemann, J. Devos, G. Shirsekar, E. Reiter, B.A. Gould,**  
164 **J.R. Stinchcombe, J. Krause, and H.A. Burbano.** 2016. Temporal patterns  
165 of damage and decay kinetics of DNA retrieved from plant herbarium  
166 specimens. R Soc Open Sci *3*:160239.
- 167 **4.Rohland, N. and M. Hofreiter.** 2007. Comparison and optimization of ancient  
168 DNA extraction. Biotechniques *42*:343-352.
- 169 **5.Kistler, L.** 2012. Ancient DNA extraction from plants. Methods in molecular  
170 biology *840*:71-79.
- 171 **6.Rogers, S.O. and A.J. Bendich.** 1985. Extraction of DNA from milligram amounts  
172 of fresh, herbarium and mummified plant tissues. Plant molecular biology  
173 *5*:69-76.
- 174 **7.Wales, N., K. Andersen, E. Cappellini, M.C. Avila-Arcos, and M.T. Gilbert.**  
175 2014. Optimization of DNA recovery and amplification from non-carbonized  
176 archaeobotanical remains. PloS one *9*:e86827.



- 177 8. **Vasan, S., X. Zhang, X. Zhang, A. Kapurniotu, J. Bernhagen, S. Teichberg, J.**  
178 **Basgen, D. Wagle, et al.** 1996. An agent cleaving glucose-derived protein  
179 crosslinks in vitro and in vivo. *Nature* 382:275-278.
- 180 9. **Poinar, H.N., M. Hofreiter, W.G. Spaulding, P.S. Martin, B.A. Stankiewicz, H.**  
181 **Bland, R.P. Evershed, G. Possnert, and S. Paabo.** 1998. Molecular  
182 coproscopy: dung and diet of the extinct ground sloth *Nothrotheriops*  
183 *shastensis*. *Science* 281:402-406.
- 184 10. **Jaenicke-Despres, V., E.S. Buckler, B.D. Smith, M.T. Gilbert, A. Cooper, J.**  
185 **Doebley, and S. Paabo.** 2003. Early allelic selection in maize as revealed by  
186 ancient DNA. *Science* 302:1206-1208.
- 187 11. **Gill, P., A.J. Jeffreys, and D.J. Werrett.** 1985. Forensic application of DNA  
188 'fingerprints'. *Nature* 318:577-579.
- 189 12. **Palmer, S.A., Moore, J.D., A.J. Clapham, P. Rose and R.G. Allaby.** 2009.  
190 Archaeogenomic evidence of ancient Nubian Barley evolution from six to  
191 two-row indicates local adaptation. *PloS one* 4:e6301.
- 192 13. **Meyer, M. and M. Kircher.** 2010. Illumina sequencing library preparation for  
193 highly multiplexed target capture and sequencing. *Cold Spring Harbor*  
194 *protocols* 2010:pdb prot5448.
- 195 14. **Deagle, B.E., J.P. Eveson, and S.N. Jarman.** 2006. Quantification of damage in  
196 DNA recovered from highly degraded samples--a case study on DNA in  
197 faeces. *Frontiers in zoology* 3:11.
- 198 15. **Allentoft, M.E., M. Collins, D. Harker, J. Haile, C.L. Oskam, M.L. Hale, P.F.**  
199 **Campos, J.A. Samaniego, et al.** 2012. The half-life of DNA in bone:  
200 measuring decay kinetics in 158 dated fossils. *Proceedings. Biological*  
201 *sciences / The Royal Society* 279:4724-4733.

- 202    **16. Briggs, A.W., U. Stenzel, P.L. Johnson, R.E. Green, J. Kelso, K. Prufer, M.**  
203            **Meyer, J. Krause, et al.** 2007. Patterns of damage in genomic DNA  
204            sequences from a Neandertal. *Proceedings of the National Academy of*  
205            *Sciences of the United States of America* *104*:14616-14621.
- 206    **17. Brotherton, P., P. Endicott, J.J. Sanchez, M. Beaumont, R. Barnett, J. Austin,**  
207            **and A. Cooper.** 2007. Novel high-resolution characterization of ancient DNA  
208            reveals C > U-type base modification events as the sole cause of post mortem  
209            miscoding lesions. *Nucleic acids research* *35*:5717-5728.
- 210    **18. Meyer, M., M. Kircher, M.T. Gansauge, H. Li, F. Racimo, S. Mallick, J.G.**  
211            **Schraiber, F. Jay, et al.** 2012. A high-coverage genome sequence from an  
212            archaic Denisovan individual. *Science* *338*:222-226.
- 213    **19. Gansauge, M.T. and M. Meyer.** 2013. Single-stranded DNA library preparation  
214            for the sequencing of ancient or damaged DNA. *Nature protocols* *8*:737-748.
- 215    **20. Green, R.E., J. Krause, A.W. Briggs, T. Maricic, U. Stenzel, M. Kircher, N.**  
216            **Patterson, H. Li, et al.** 2010. A draft sequence of the Neandertal genome.  
217            *Science* *328*:710-722.
- 218    **21. Briggs, A.W., J.M. Good, R.E. Green, J. Krause, T. Maricic, U. Stenzel, C.**  
219            **Lalueza-Fox, P. Rudan, et al.** 2009. Targeted retrieval and analysis of five  
220            Neandertal mtDNA genomes. *Science* *325*:318-321.
- 221    **22. Bennett, E.A., D. Massilani, G. Lizzo, J. Daligault, E.M. Geigl, and T. Grange.**  
222            2014. Library construction for ancient genomics: single strand or double  
223            strand? *Biotechniques* *56*:289-290, 292-286, 298, passim.
- 224    **23. Wales, N., C. Caroe, M. Sandoval-Velasco, C. Gamba, R. Barnett, J.A.**  
225            **Samaniego, J.R. Madrigal, L. Orlando, and M.T. Gilbert.** 2015. New

226            insights on single-stranded versus double-stranded DNA library preparation

227            for ancient DNA. *Biotechniques* 59:368-371.

228

229 **Figure 1. Experimental design for testing the effect of DNA extraction and**  
230 **library preparation protocols on properties of sequenced libraries from**  
231 **herbarium specimens.** Experiments were conducted in three phases. In phase one we  
232 subject 10 herbarium specimens of *Arabidopsis thaliana* to extraction with two  
233 different lysis buffers and compare sequencing results. In phase two we tested two  
234 DNA-binding methods on second set of 10 *A. thaliana* specimens. In phase three we  
235 compared the libraries constructed with double- and single-stranded methods.

236 **Figure 2. The effect of DNA extraction and library preparation protocols on**  
237 **different properties of DNA sequencing libraries.** The figure depicts the results  
238 from experiments in phases 1-3 (Figure 1). (A) Distribution of fragment lengths of  
239 merged reads mapped to the *Arabidopsis thaliana* reference genome. The y-axis  
240 shows the kernel density estimates. (B-G) Distributions represented as box and  
241 whisker plots; medians are depicted by thick black lines, boxes represent data  
242 between quartile Q1 and Q3, whiskers extend to 1.5 times the interquartile range  
243 between Q1 and Q3, and points symbolize outliers. Comparisons within experiments  
244 that result in significant differences in a paired t-test are connected with black lines  
245 ('\*\*\*' indicates an alpha level of 0.005) (B) Fragment length medians. (C)  
246 Proportion of broken DNA fragments ( $\lambda$ ). (D) Proportion of GC content. (E)  
247 Proportion of endogenous DNA (proportion of reads mapped to *A. thaliana* reference  
248 genome). (F) Number of unique molecules per base of *A. thaliana* reference genome  
249 (molecule coverage of DNA extract) calculated from qPCR measurements on  
250 unamplified libraries. (G) Percentage of cytosine to thymine substitutions at first base  
251 at the 5' end.

Fig. 1

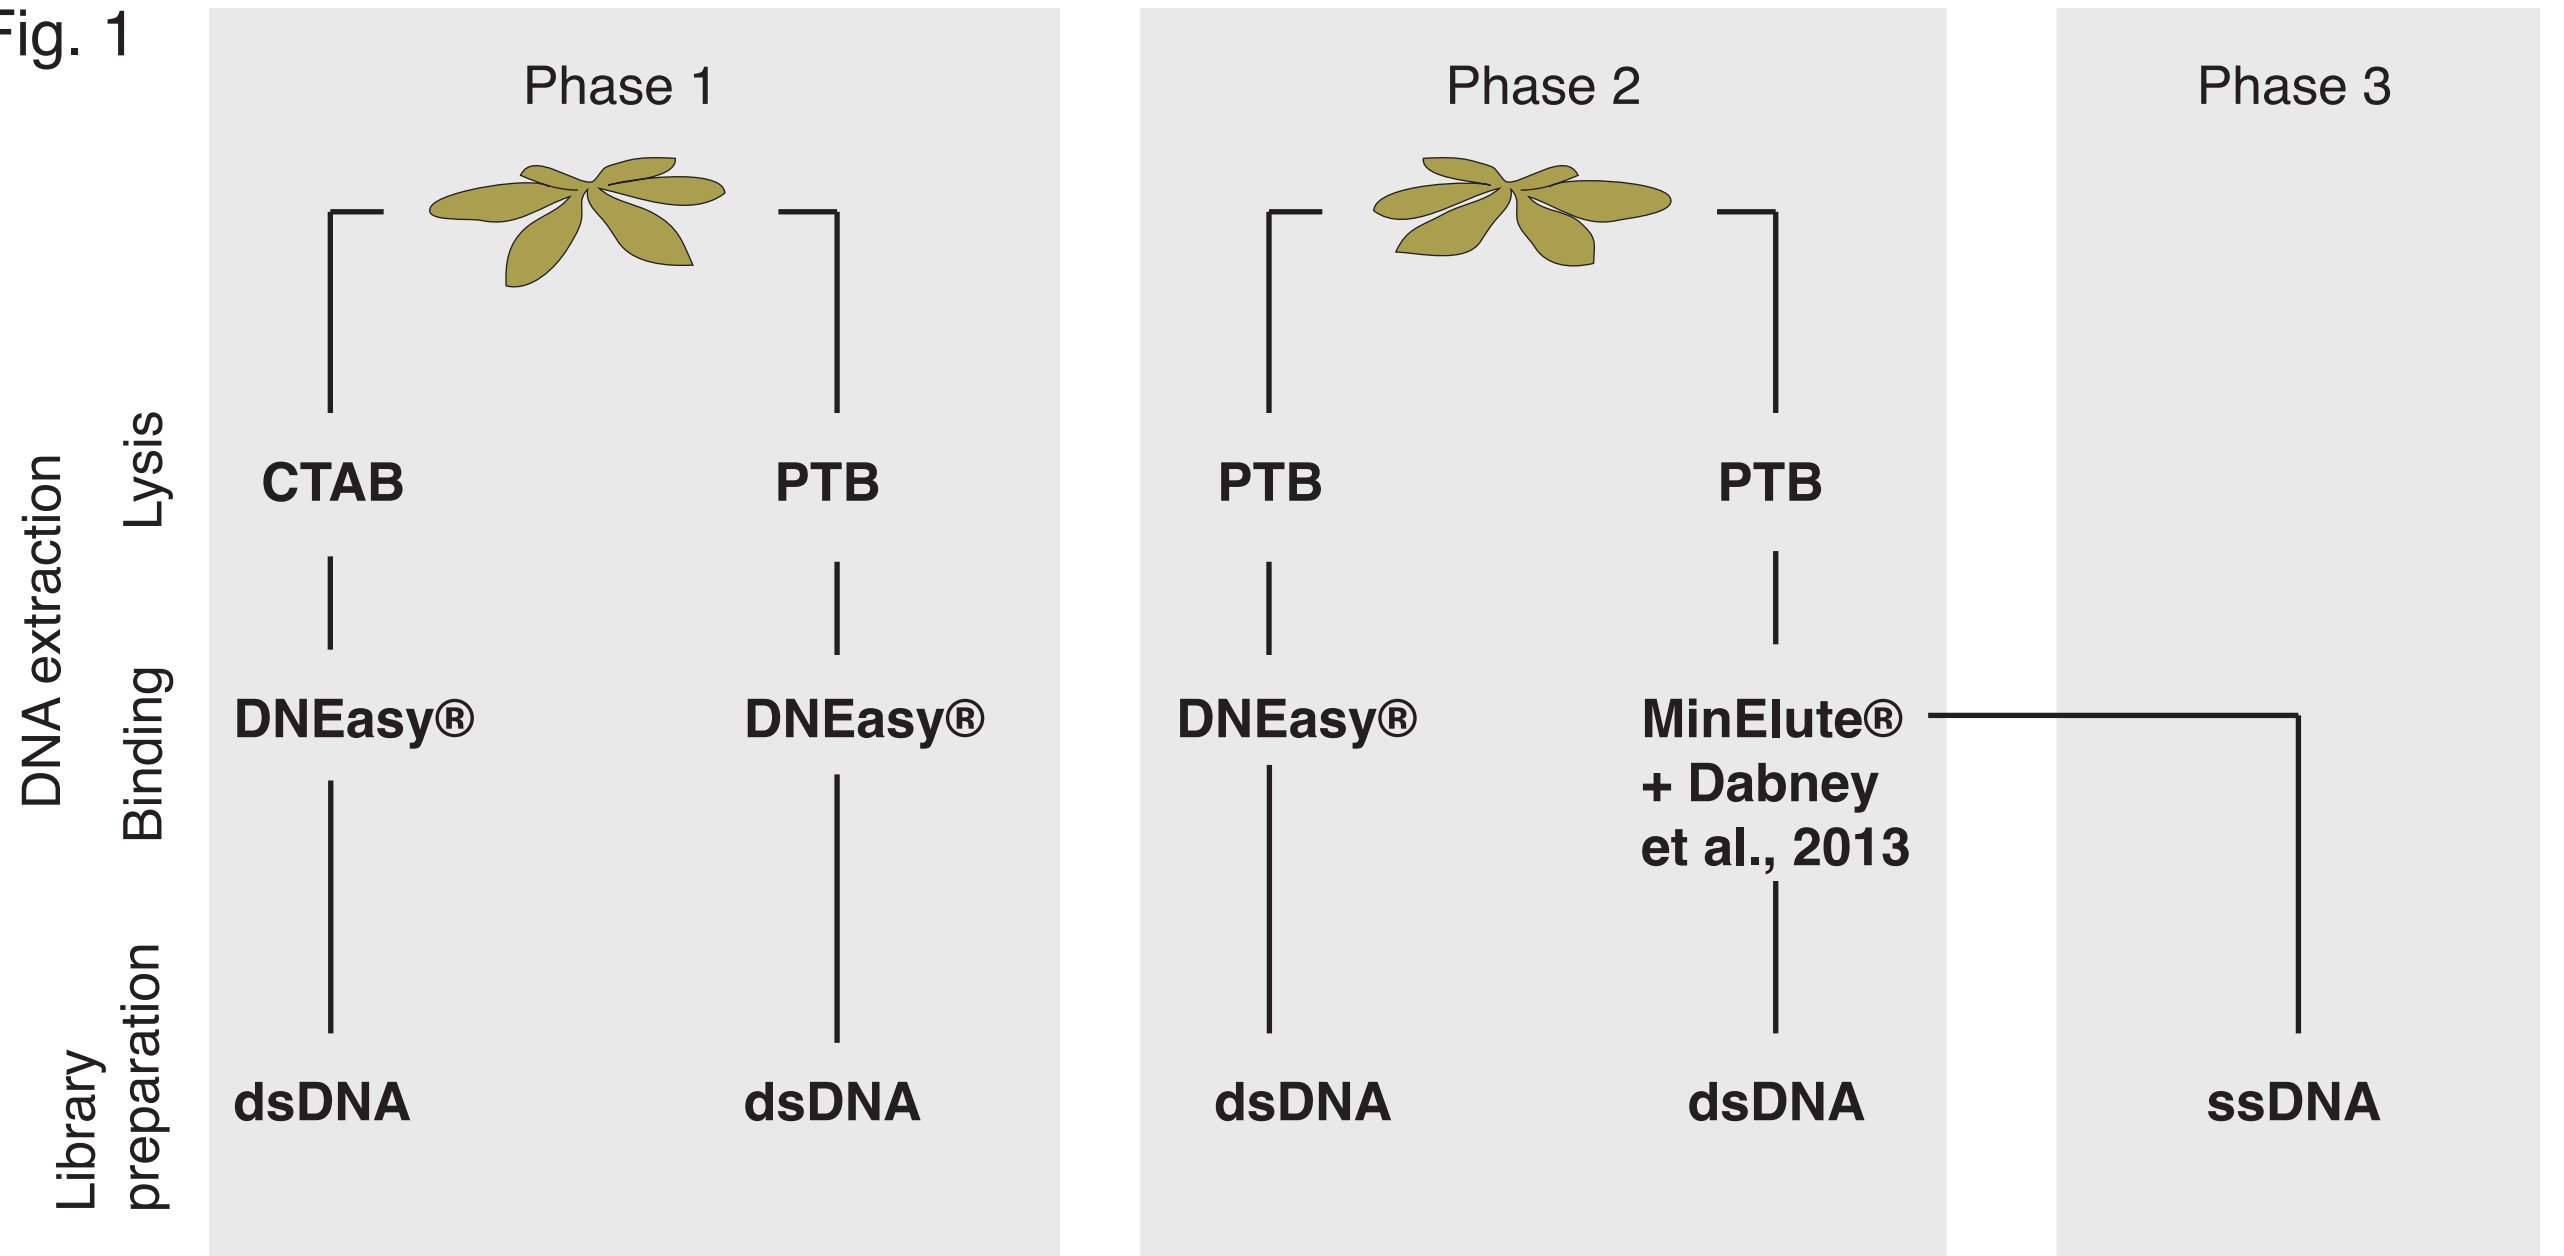

Fig. 2 A

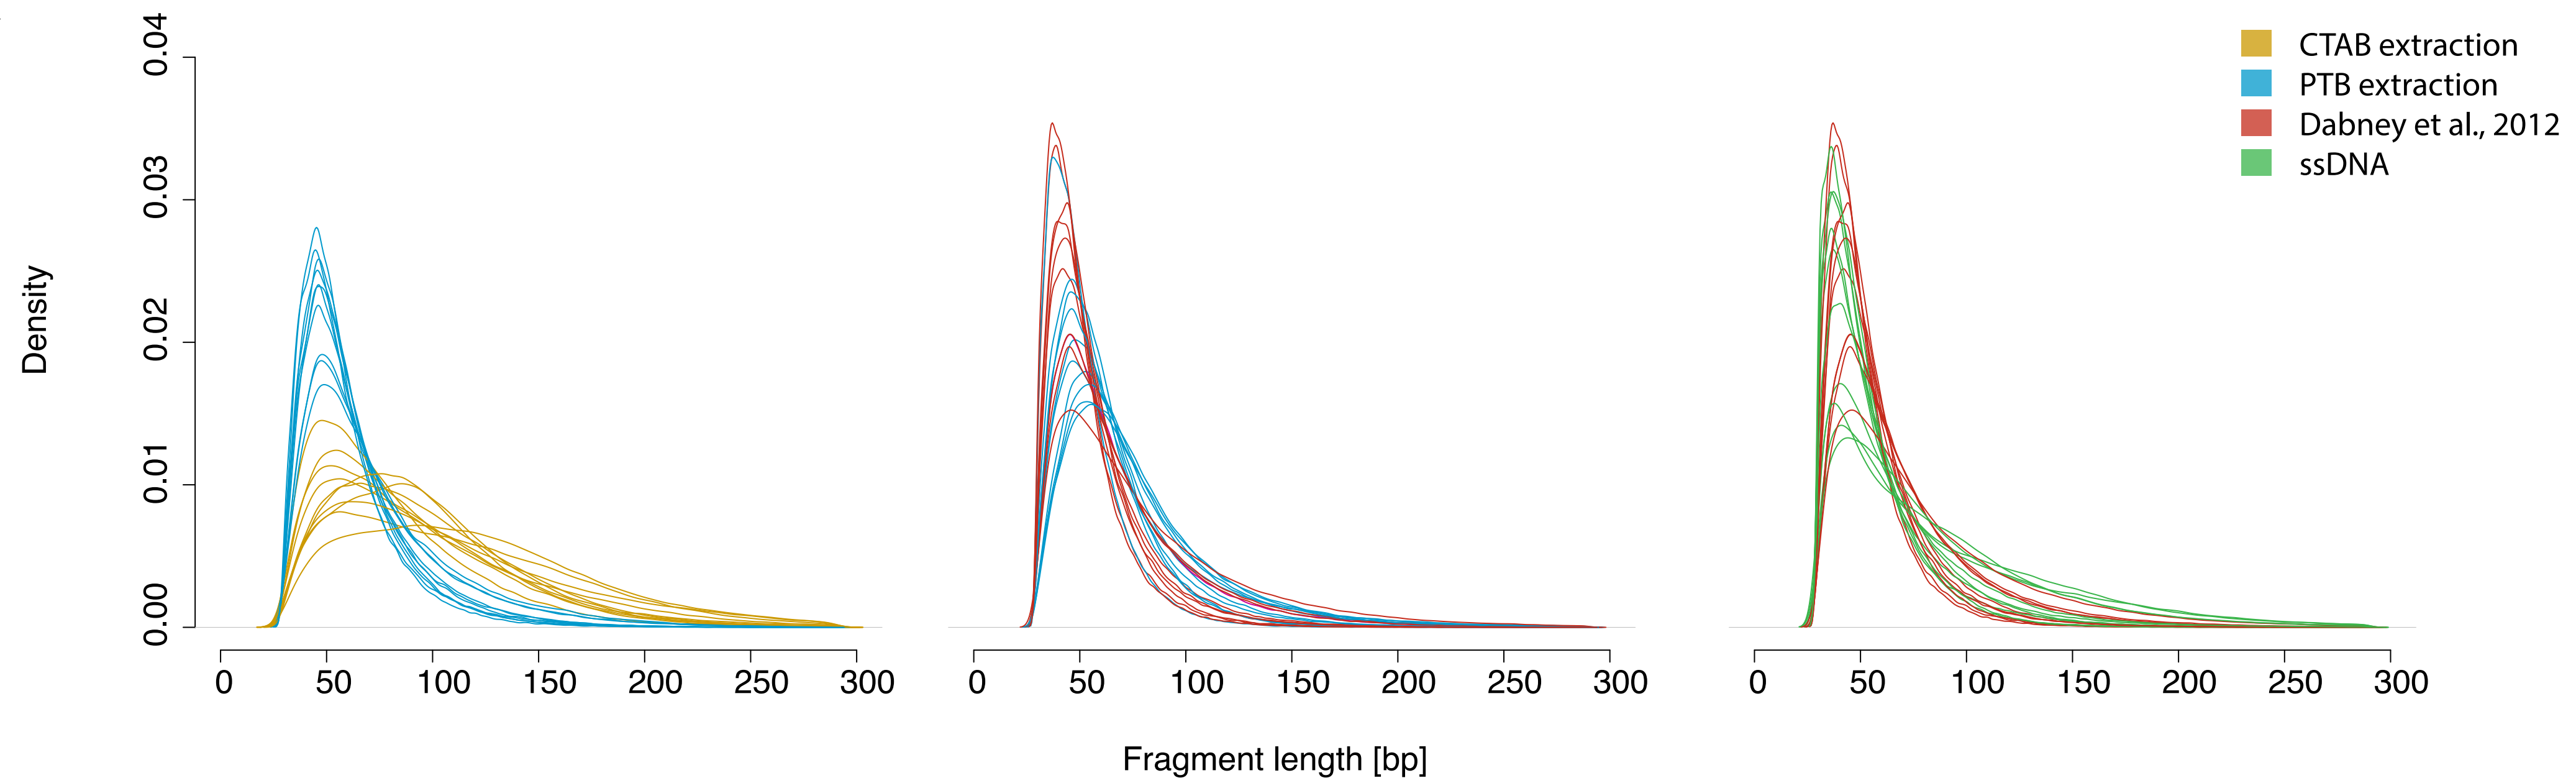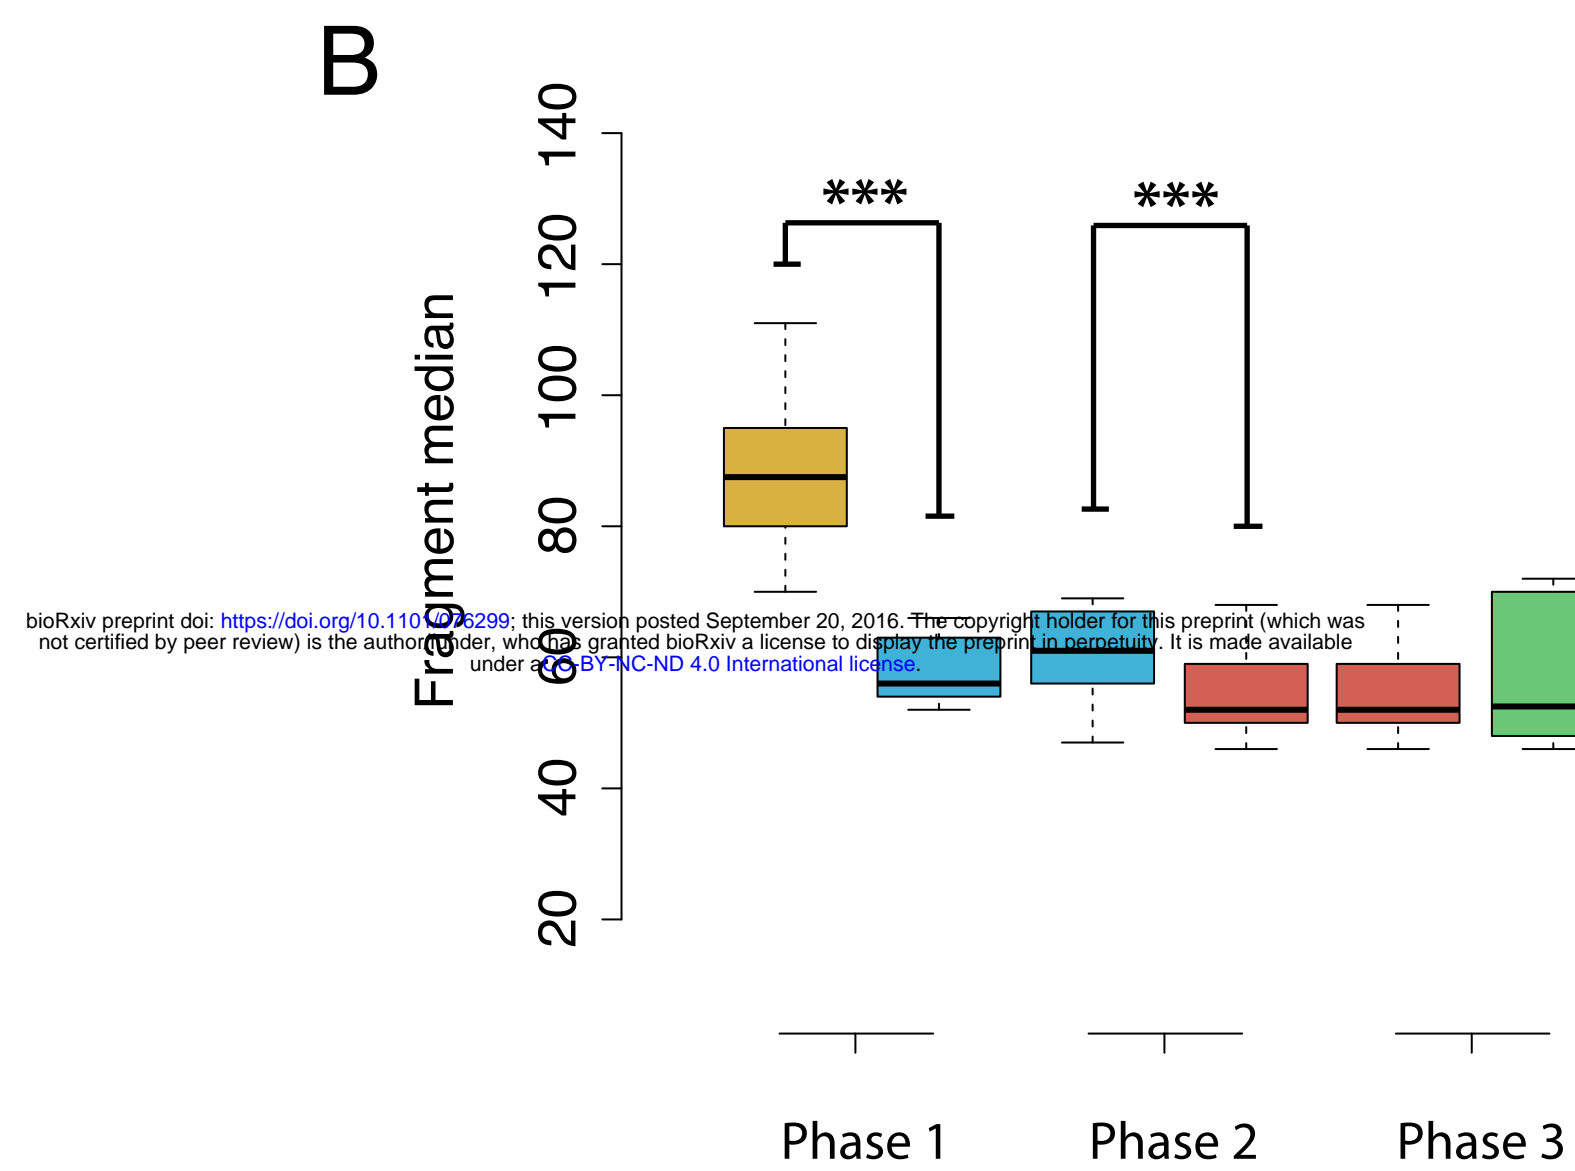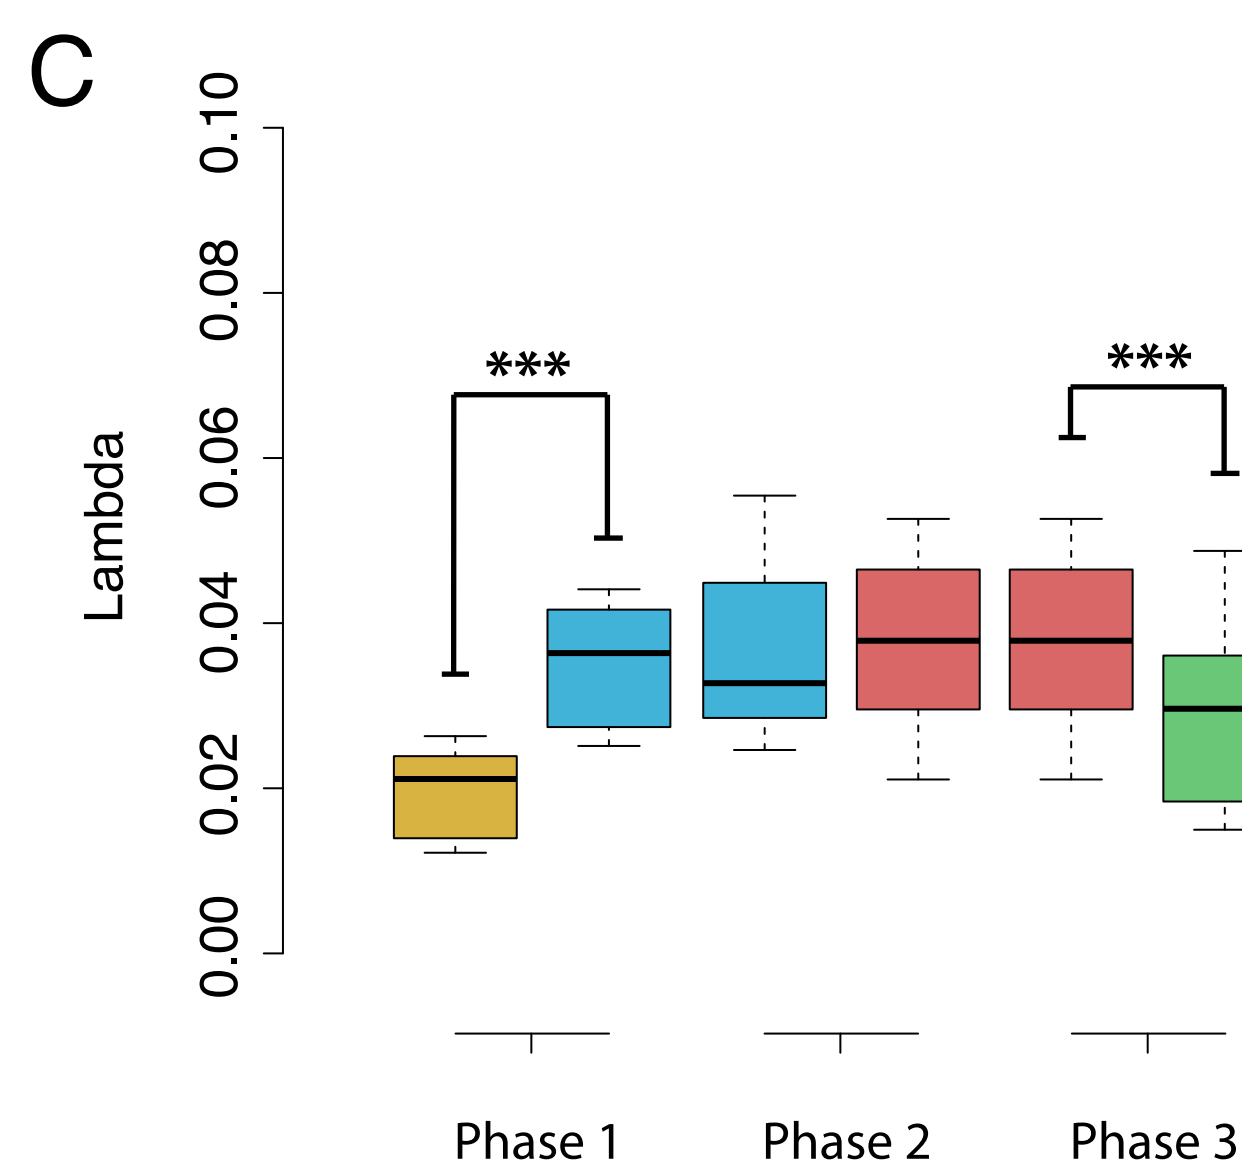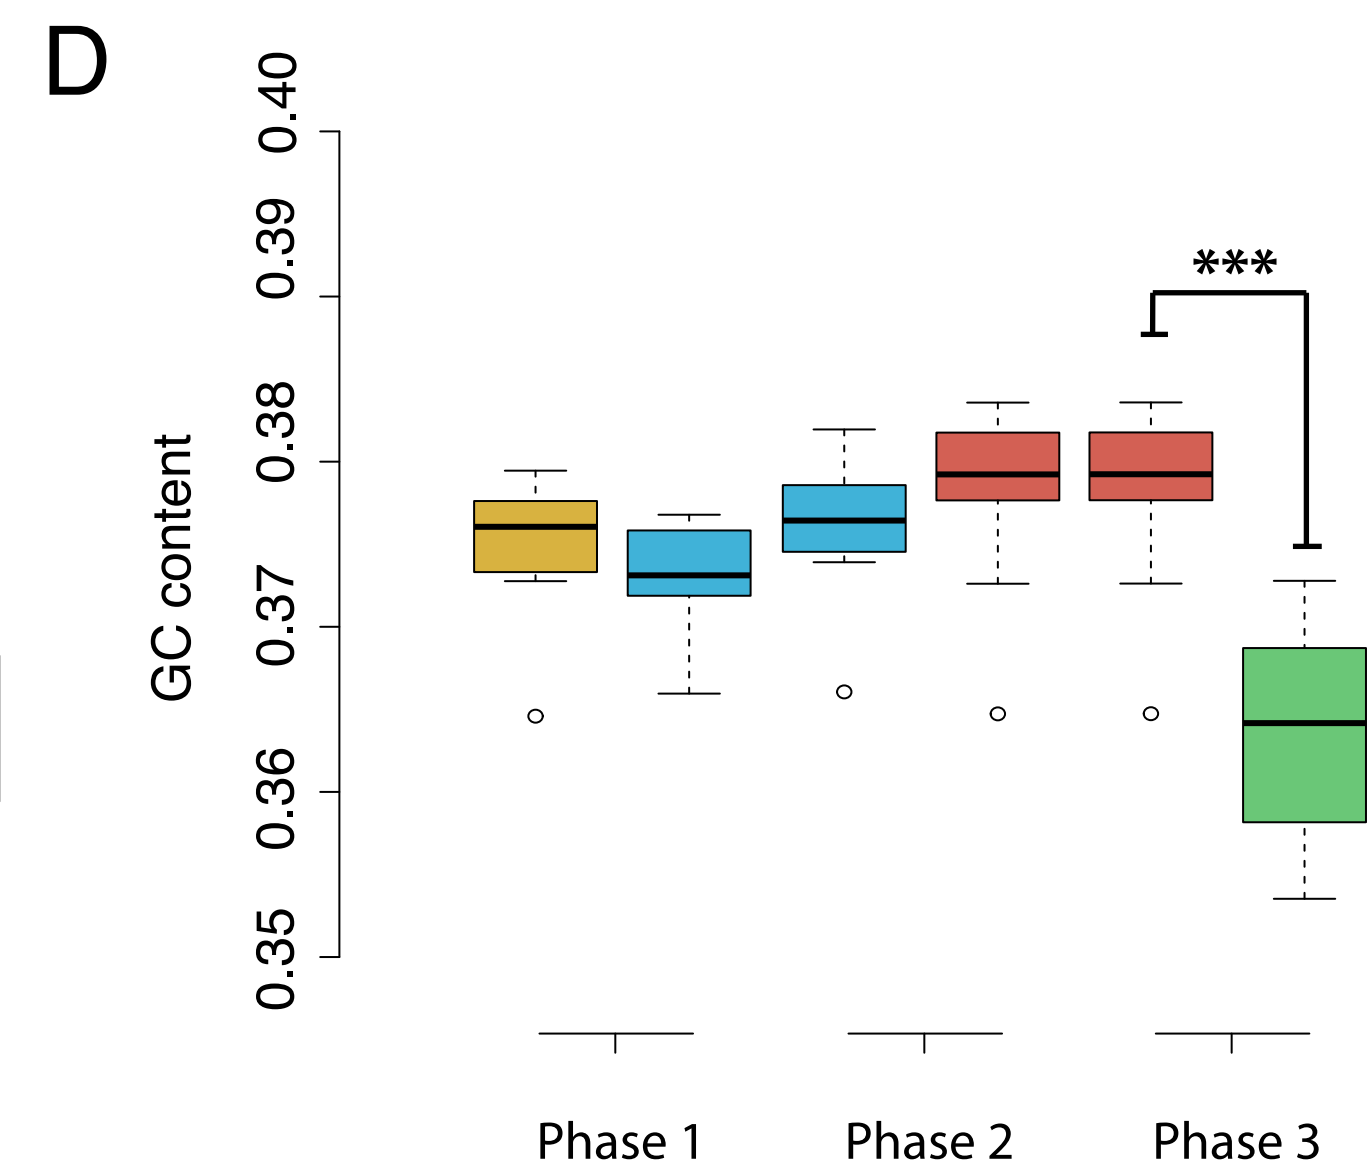

bioRxiv preprint doi: <https://doi.org/10.1101/092999>; this version posted September 20, 2016. The copyright holder for this preprint (which was not certified by peer review) is the author/funder, who has granted bioRxiv a license to display the preprint in perpetuity. It is made available under aCC-BY-NC-ND 4.0 International license.

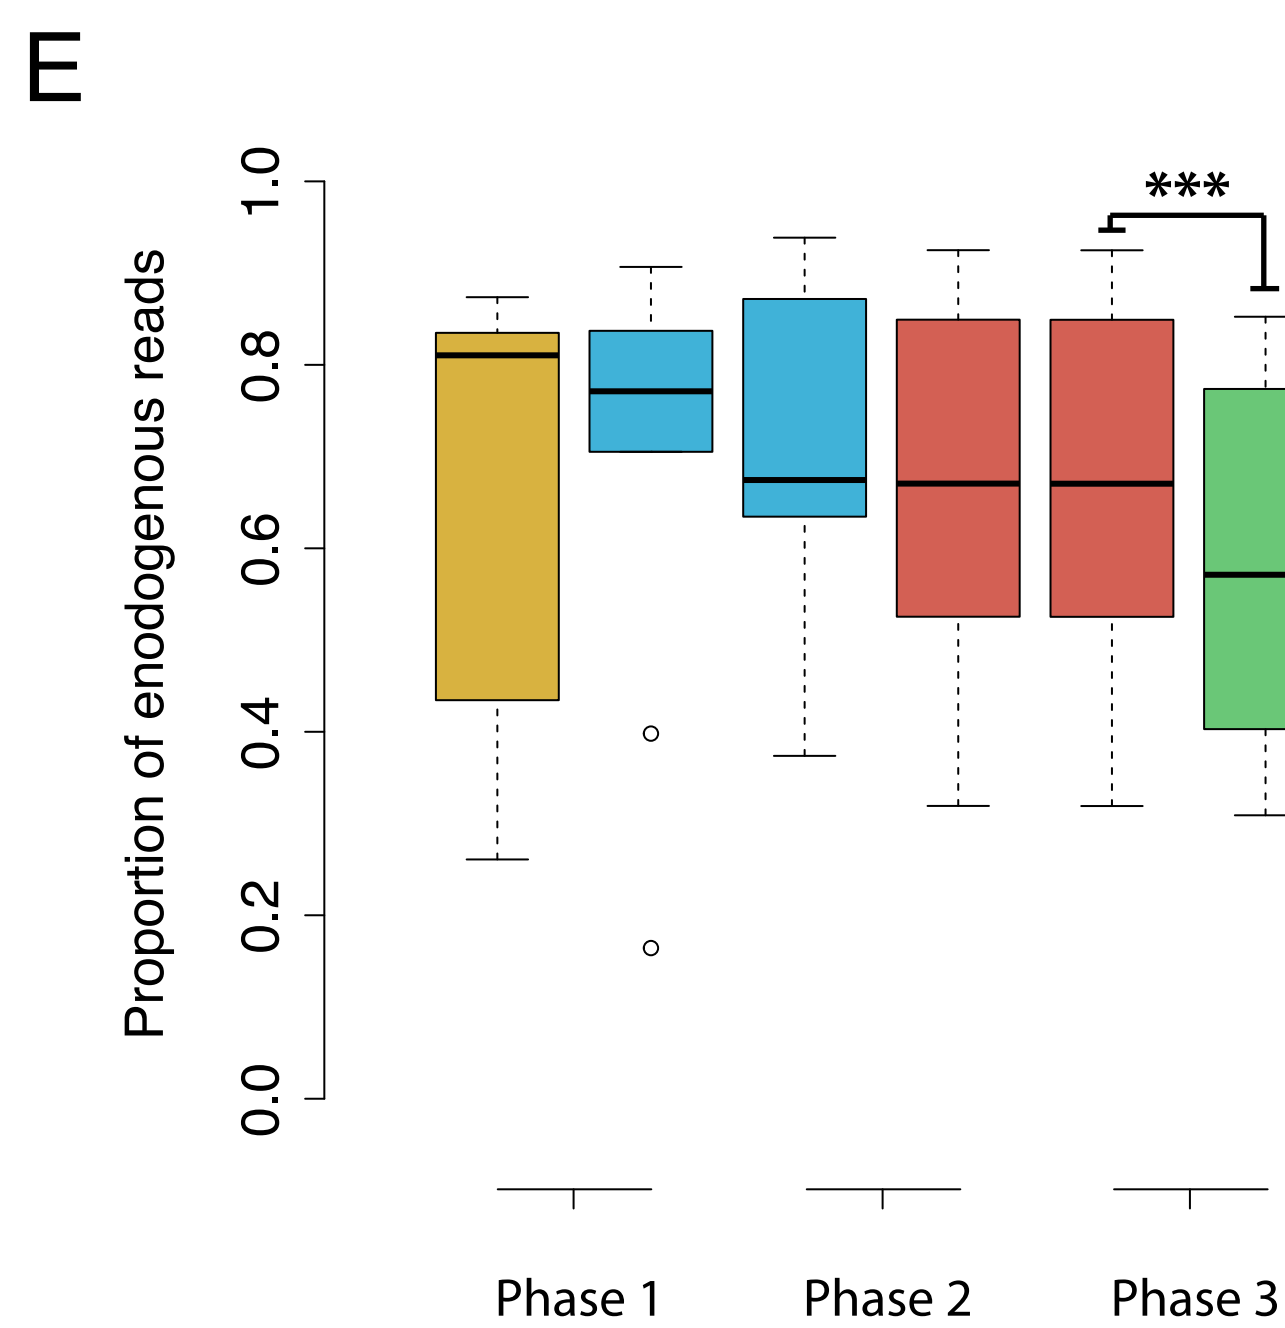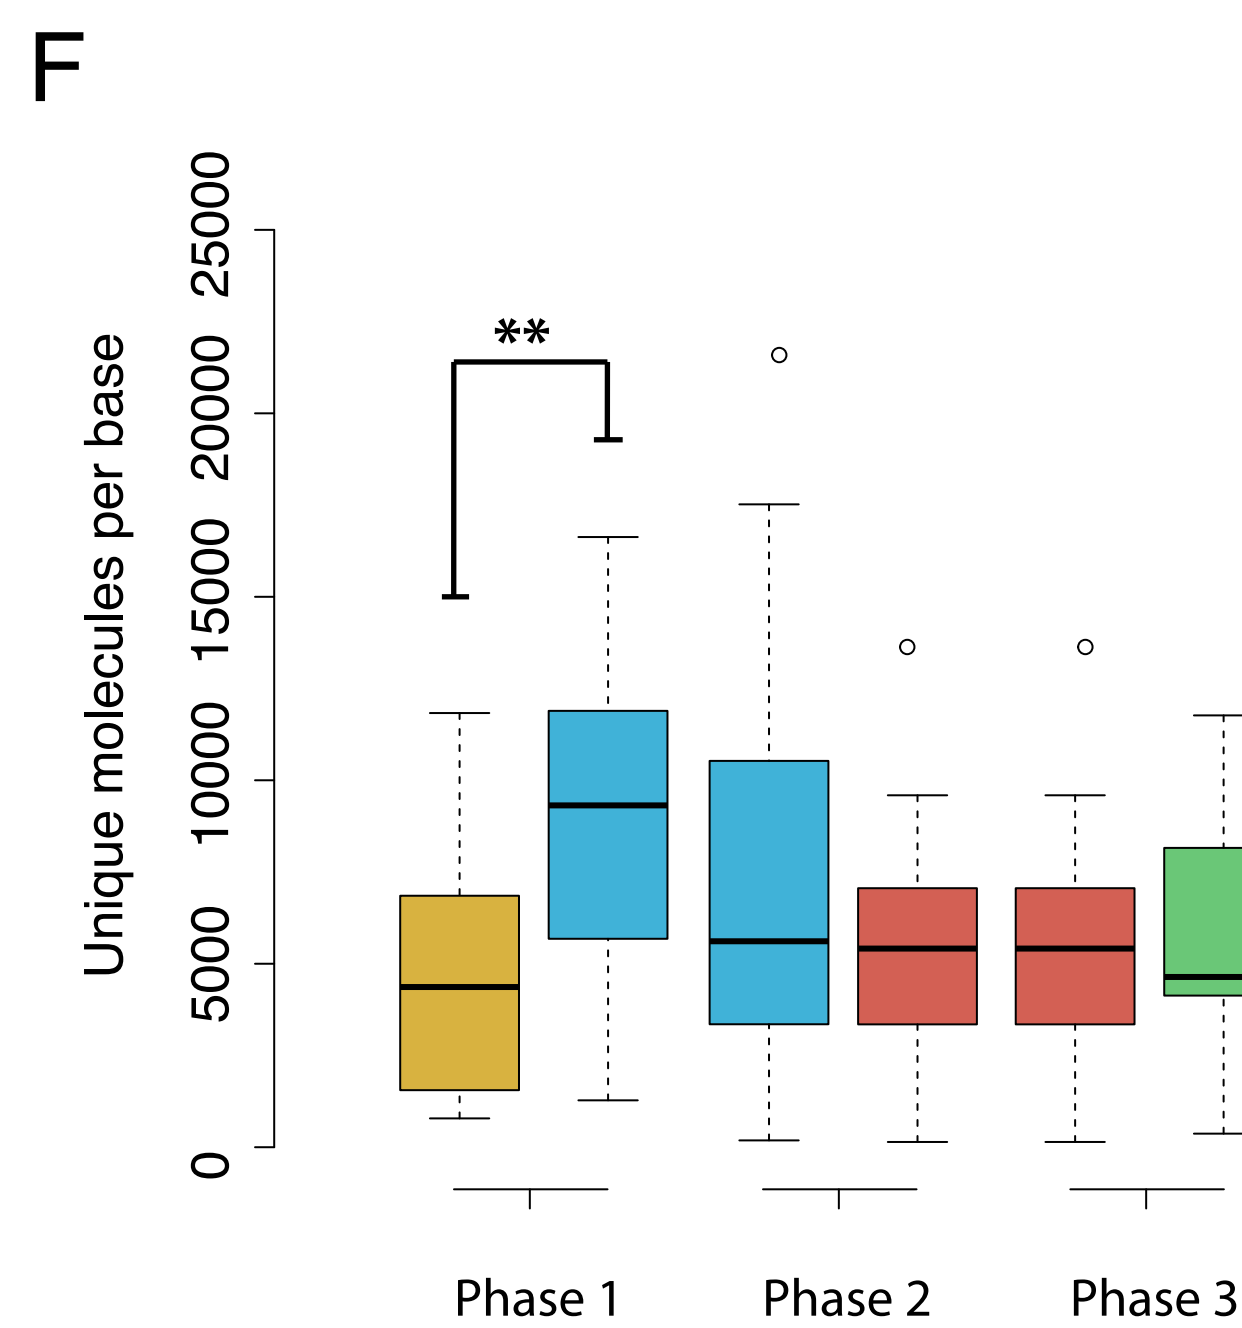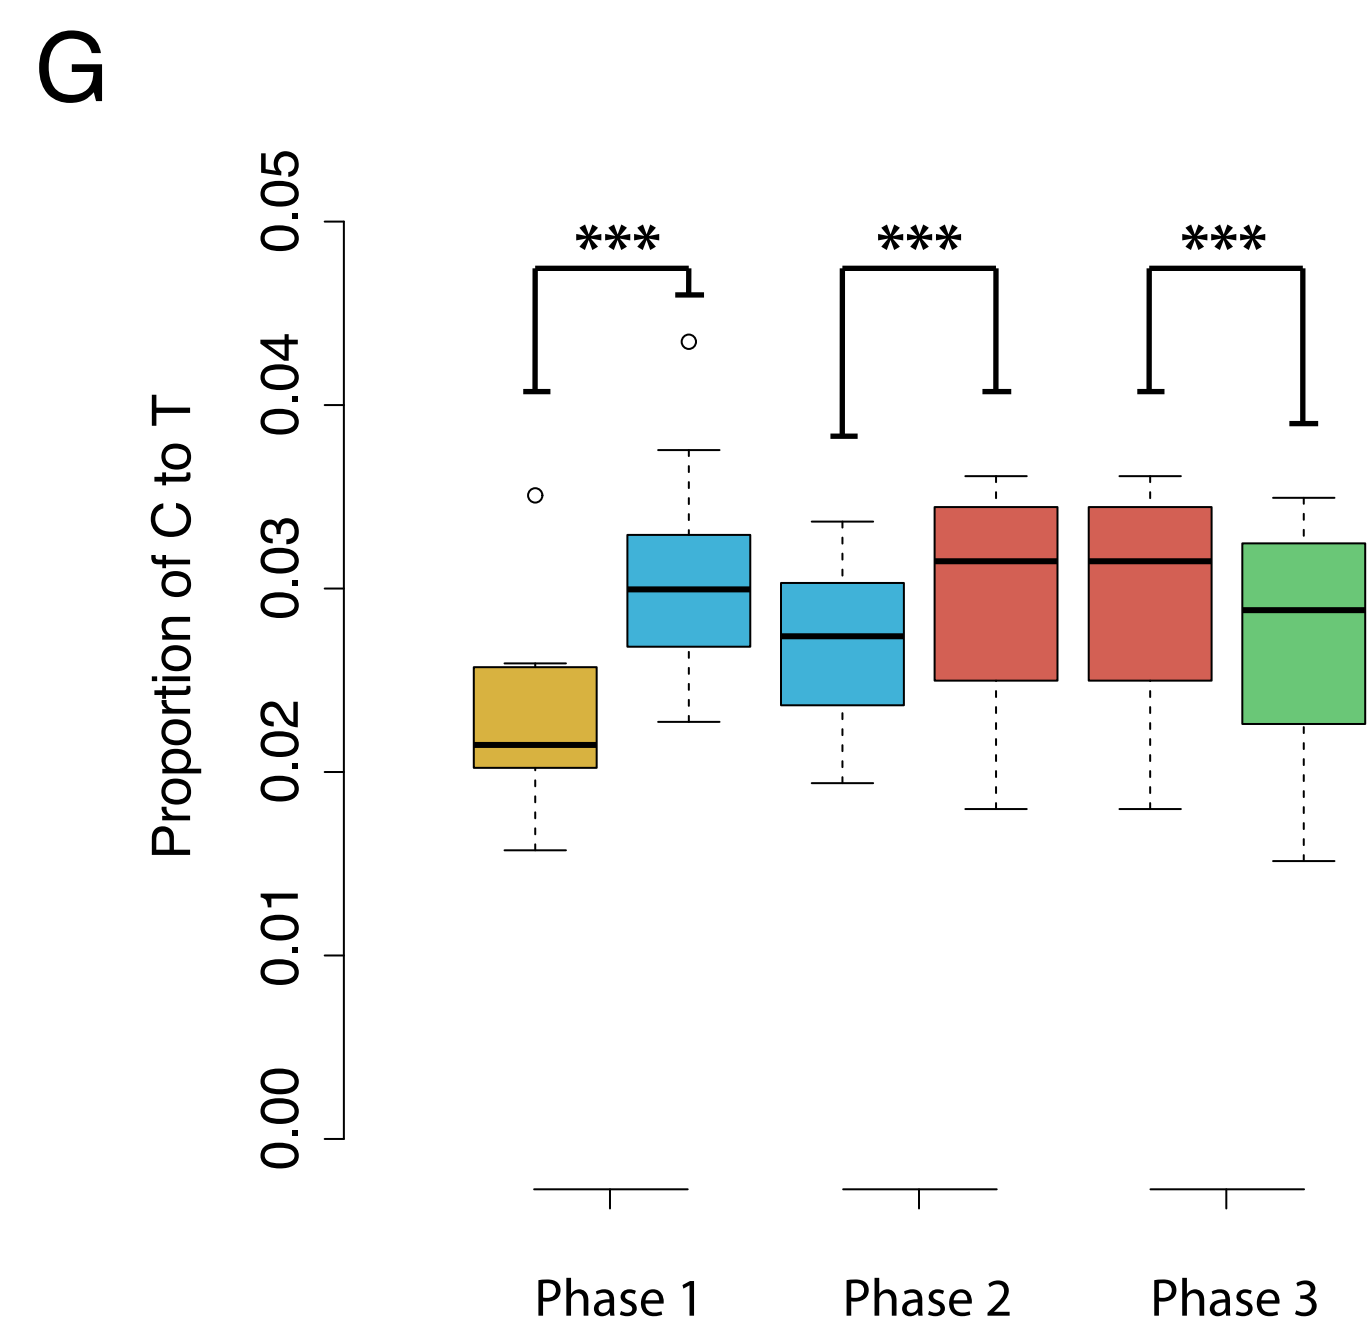

Source: https://www.biorxiv.org/content/10.1101/076299v1.full.pdf
